# Supplementary material for: Surface-confined FRET nanoplatform printed via pyro-EHD jet for stable and reproducible TNF-α detection
Source: Royal Society of Chemistry journal article supplement (doi:10.1039/d6ra00144k), 2026-04-20
Supplement: d6ra00144k1.pdf [file d6ra00144k1.pdf]

1

## 2 **Surface-Confined FRET Nanoplatfom Printed via Pyro-EHD Jet for** 3 **Stable and Reproducible TNF- $\alpha$ Detection**

4 Stefania Carbone <sup>a,b, †</sup>, Simone Russo<sup>a,c, †</sup>, Anna Palma<sup>b</sup>, Giuseppe Junior Mosca<sup>a</sup>, Sara La Manna<sup>d</sup>,  
5 Alessia Cugudda<sup>d</sup>, Sara Coppola <sup>b</sup>, Pier Luca Maffettone<sup>a,b</sup>, Simonetta Grilli<sup>b,\*</sup>, Giuseppe Vitiello<sup>a,c\*</sup>,  
6 Concetta Di Natale<sup>a,b,\*</sup>

7 <sup>a</sup> Department of Chemical, Materials and Industrial Production Engineering, University of Naples  
8 Federico II, Piazzale Tecchio 80, 80125 Naples, Italy

9 <sup>b</sup> Institute of Applied Sciences and Intelligent Systems (ISASI), National Research Council of Italy  
10 (CNR), Pozzuoli, NA 80078, Italy.

11 <sup>c</sup> Center for Colloid and Surface Science (CSGI), via della Lastruccia, Sesto Fiorentino, FI 80078,  
12 Italy

13 <sup>d</sup> Department of Pharmacy, University of Naples Federico II, 80131 Naples, Italy

14

15 <sup>†</sup> These authors equally contributed to this work.

16 \*corresponding authors: [giuseppe.vitiello@unina.it](mailto:giuseppe.vitiello@unina.it) [concetta.dinatale@unina.it](mailto:concetta.dinatale@unina.it),  
17 [simonetta.grilli@cnr.it](mailto:simonetta.grilli@cnr.it)

18

19

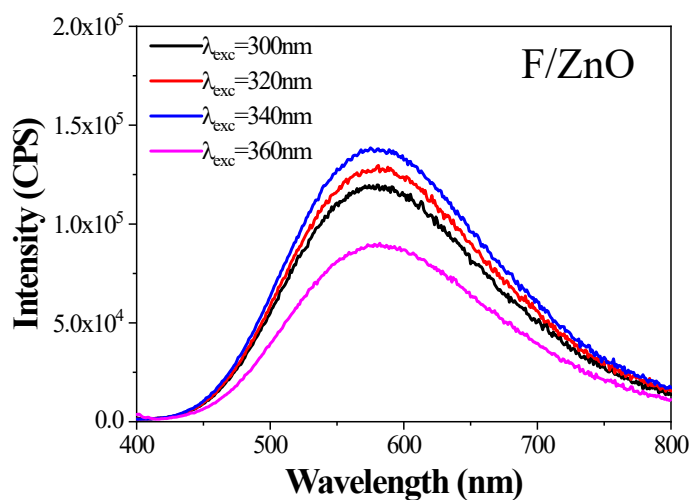

20

21

**Figure S1:** Emission map of F/ZnO QDs

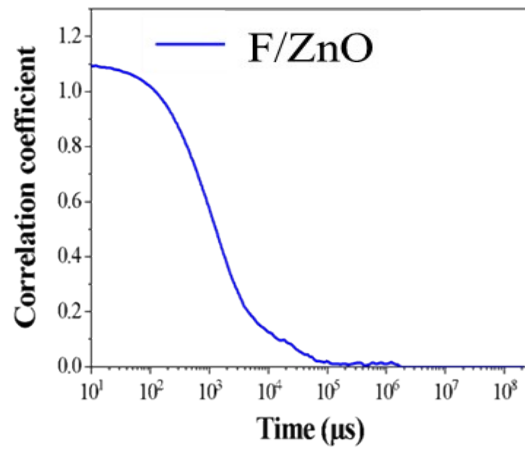

22

23 **Figure S2:** Result of the DLS measurements on F/ZnO in solution with the behaviour of the autocorrelation function.

24

25

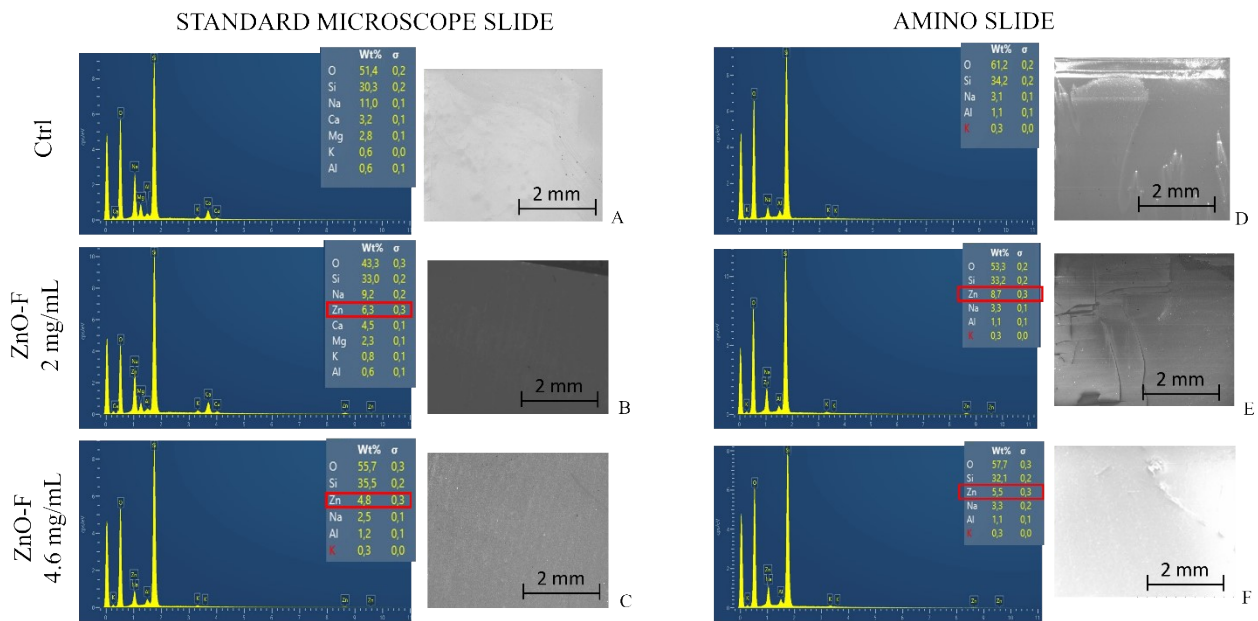

26

27 **Figure S3:** SEM and EDX of the respective slides: (A) control microscope standard slide, (B) microscope standard  
 28 slide 2 mg/mL of F/ZnO, (C) microscope standard slide 4.6 mg/mL of F/ZnO, (D) control amino slide, (E) amino slide 2  
 29 mg/mL of F/ZnO, (F) amino slide 4.6 mg/mL of F/ZnO.

30

31

32

## BACKGROUND LEVELS

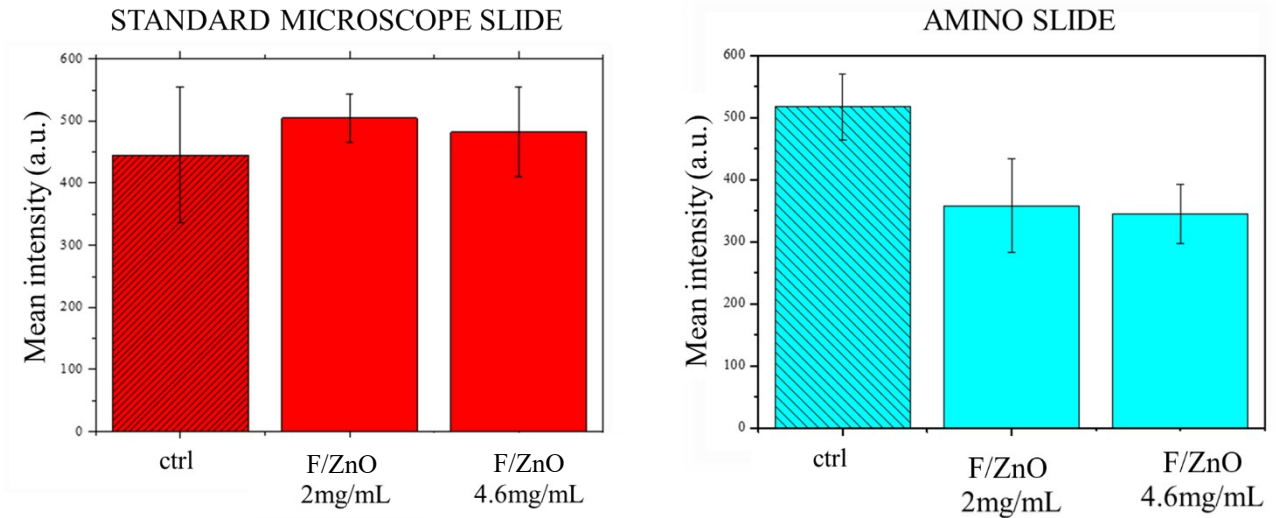

33

34

**Figure S4:** Background emission intensity of 2D slides

35

36

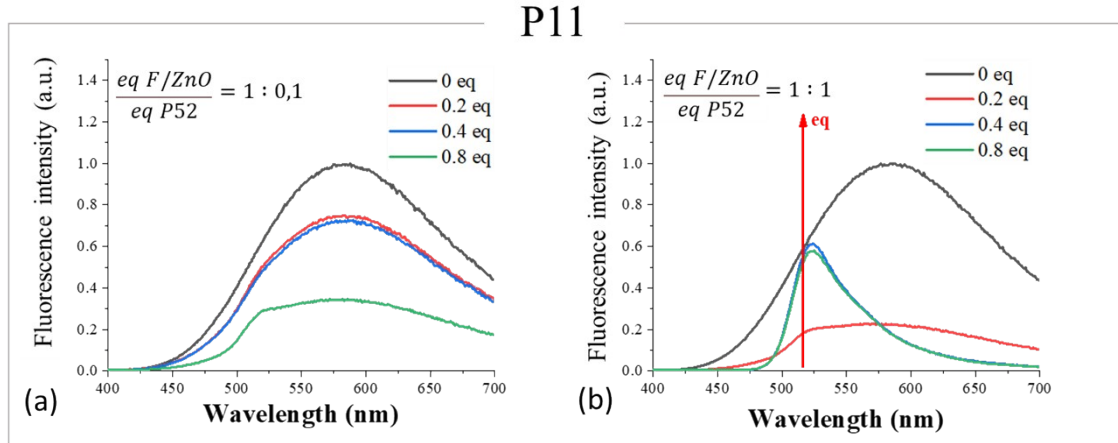

37

**Figure S5:** Normalized mission spectra of F/ZnO QDs at different equivalents of P11 with a 1:0.1 ratio **(a)**, normalized emission spectra of F/ZnO QDs at different equivalents of P11 with a 1:1 ratio **(b)**.

40

41

42

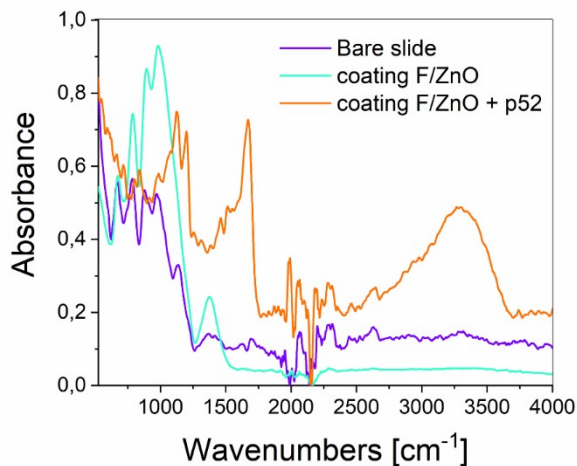

43

44 **Figure S6.** FTIR spectra of bare glass slide (purple), F/ZnO-coated slide (cyan), and F/ZnO + p52 functionalized slide  
 45 (orange). The spectrum of the bare slide serves as background reference. The F/ZnO-coated slide shows minimal  
 46 absorption features in the amide region, while the F/ZnO + p52 sample displays pronounced amide I (~1650 cm<sup>-1</sup>) and  
 47 amide II (~1540 cm<sup>-1</sup>) bands, indicating successful immobilization of the p52 peptide on the ZnO surface. Compared to  
 48 typical free-peptide signatures, these bands are slightly broadened and shifted, consistent with perturbation of C=O  
 49 and N-H moieties due to coordination with Zn<sup>2+</sup> surface sites. Additionally, the O-H / N-H stretching region (3000–  
 50 3600 cm<sup>-1</sup>) becomes more intense and structured upon peptide binding, suggesting altered hydrogen-bonding and  
 51 possible partial coordination of amine groups. Subtle changes in the Zn–O vibration region (450–550 cm<sup>-1</sup>) further  
 52 support interaction between peptide donor groups and surface Zn<sup>2+</sup>. Collectively, these spectral features constitute  
 53 qualitative evidence of peptide adsorption and coordination-based binding on the F/ZnO surface, an essential basis for  
 54 the controlled donor–acceptor spacing enabling the solid-supported FRET configuration.

55

## CONTROLS

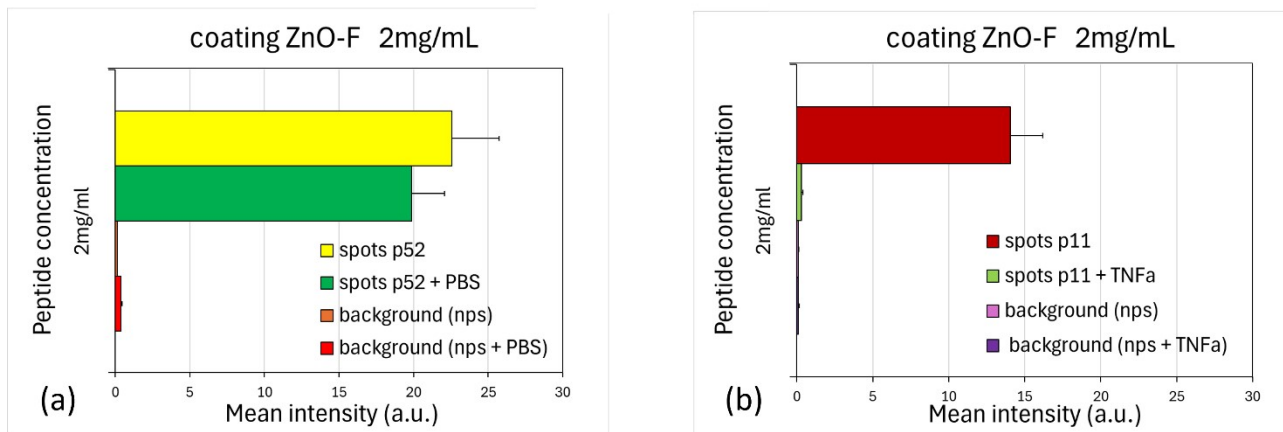

56

57 **Figure S7: (a)** Mean fluorescence values of p-jet micro-spots in the case of the concentrations of P52 (2 mg/mL) and  
 58 background levels of the F/ZnO coated amino slide, after spotting and after the rinsing of the slide with PBS, used as a  
 59 vehicle for the analyte. **(b)** Mean fluorescence values of p-jet micro-spots in the case of the concentrations of P11 (2  
 60 mg/mL) and background levels of the F/ZnO coated amino slide, after spotting 140 ng/mL of TNF- $\alpha$  on P11 and after  
 61 the rinsing of the slide with PBS. The fluorescence data were obtained as mean values over ten replicates of spots and  
 62 subtracted by the control (blank spots). The SNR was >3 for all the spots.

63
